# Supplementary material for: Extended steep ramp test normative values for 19–24-year-old healthy active young adults
Source: Springer Nature journal article supplement (doi:10.1007/s00421-019-04255-x), 2019-11-08
Supplement: MOESM5 [file 17366596]

Supplemental Digital Content 1

Supplementary Table 1. Age- and sex-related reference centiles for absolute SRT-WR<sub>peak</sub>.

| Age<br>(years) | SRT-WR <sub>peak</sub> (W) |     |     |            |     |     |     |         |     |     |            |     |     |     |
|----------------|----------------------------|-----|-----|------------|-----|-----|-----|---------|-----|-----|------------|-----|-----|-----|
|                | Males                      |     |     |            |     |     |     | Females |     |     |            |     |     |     |
|                | P3                         | P10 | P25 | <b>P50</b> | P75 | P90 | P97 | P3      | P10 | P25 | <b>P50</b> | P75 | P90 | P97 |
| 8.0            | 109                        | 117 | 126 | <b>135</b> | 146 | 158 | 172 | 99      | 107 | 117 | <b>128</b> | 140 | 153 | 168 |
| 8.5            | 118                        | 127 | 136 | <b>147</b> | 159 | 173 | 188 | 108     | 117 | 128 | <b>140</b> | 153 | 167 | 183 |
| 9.0            | 126                        | 136 | 147 | <b>159</b> | 173 | 187 | 204 | 116     | 127 | 139 | <b>151</b> | 166 | 181 | 198 |
| 9.5            | 134                        | 145 | 158 | <b>171</b> | 186 | 202 | 219 | 126     | 137 | 150 | <b>164</b> | 180 | 196 | 214 |
| 10.0           | 142                        | 155 | 168 | <b>183</b> | 199 | 216 | 235 | 135     | 148 | 162 | <b>177</b> | 194 | 211 | 231 |
| 10.5           | 151                        | 165 | 180 | <b>196</b> | 213 | 232 | 252 | 144     | 159 | 174 | <b>191</b> | 209 | 227 | 248 |
| 11.0           | 159                        | 175 | 191 | <b>209</b> | 228 | 248 | 269 | 154     | 170 | 187 | <b>205</b> | 224 | 244 | 265 |
| 11.5           | 169                        | 186 | 204 | <b>224</b> | 244 | 265 | 288 | 164     | 181 | 199 | <b>219</b> | 239 | 260 | 282 |
| 12.0           | 178                        | 197 | 217 | <b>238</b> | 260 | 283 | 306 | 174     | 193 | 212 | <b>233</b> | 254 | 276 | 299 |
| 12.5           | 189                        | 210 | 232 | <b>255</b> | 278 | 303 | 327 | 183     | 203 | 224 | <b>246</b> | 268 | 291 | 315 |
| 13.0           | 200                        | 223 | 247 | <b>272</b> | 297 | 322 | 348 | 192     | 214 | 236 | <b>259</b> | 282 | 306 | 331 |
| 13.5           | 213                        | 238 | 264 | <b>290</b> | 317 | 344 | 371 | 200     | 222 | 246 | <b>269</b> | 294 | 319 | 344 |
| 14.0           | 226                        | 253 | 281 | <b>309</b> | 337 | 366 | 394 | 208     | 231 | 256 | <b>280</b> | 306 | 331 | 357 |
| 14.5           | 239                        | 268 | 298 | <b>327</b> | 357 | 386 | 416 | 213     | 238 | 263 | <b>289</b> | 314 | 340 | 367 |
| 15.0           | 252                        | 283 | 314 | <b>345</b> | 376 | 407 | 438 | 219     | 245 | 271 | <b>297</b> | 323 | 350 | 376 |
| 15.5           | 264                        | 296 | 329 | <b>361</b> | 393 | 425 | 456 | 223     | 250 | 276 | <b>303</b> | 329 | 356 | 383 |
| 16.0           | 275                        | 310 | 343 | <b>377</b> | 410 | 442 | 475 | 227     | 254 | 282 | <b>309</b> | 336 | 363 | 390 |
| 16.5           | 285                        | 321 | 356 | <b>390</b> | 423 | 457 | 489 | 230     | 258 | 286 | <b>313</b> | 341 | 368 | 395 |
| 17.0           | 295                        | 332 | 368 | <b>403</b> | 437 | 471 | 504 | 234     | 262 | 290 | <b>318</b> | 346 | 373 | 400 |
| 17.5           | 303                        | 342 | 379 | <b>414</b> | 449 | 483 | 516 | 236     | 266 | 294 | <b>322</b> | 350 | 377 | 404 |
| 18.0           | 312                        | 352 | 389 | <b>426</b> | 461 | 495 | 528 | 239     | 269 | 298 | <b>327</b> | 354 | 382 | 409 |
| 18.5           | 319                        | 360 | 399 | <b>436</b> | 471 | 506 | 539 | 242     | 272 | 302 | <b>330</b> | 358 | 385 | 412 |
| 19.0           | 327                        | 369 | 408 | <b>446</b> | 482 | 516 | 550 | 244     | 275 | 305 | <b>334</b> | 362 | 389 | 416 |
| 19.5           | 333                        | 376 | 416 | <b>455</b> | 491 | 525 | 558 | 246     | 277 | 307 | <b>336</b> | 364 | 391 | 418 |
| 20.0           | 339                        | 383 | 424 | <b>463</b> | 499 | 534 | 567 | 248     | 280 | 310 | <b>338</b> | 366 | 393 | 420 |
| 20.5           | 343                        | 389 | 431 | <b>469</b> | 506 | 541 | 574 | 249     | 281 | 310 | <b>339</b> | 367 | 394 | 420 |
| 21.0           | 348                        | 394 | 437 | <b>476</b> | 513 | 548 | 581 | 250     | 281 | 311 | <b>340</b> | 368 | 394 | 420 |
| 21.5           | 350                        | 398 | 441 | <b>480</b> | 517 | 552 | 585 | 250     | 281 | 311 | <b>340</b> | 367 | 393 | 419 |
| 22.0           | 353                        | 402 | 445 | <b>485</b> | 522 | 557 | 589 | 251     | 281 | 311 | <b>339</b> | 366 | 393 | 418 |
| 22.5           | 355                        | 404 | 448 | <b>488</b> | 525 | 559 | 592 | 250     | 281 | 310 | <b>338</b> | 364 | 390 | 416 |
| 23.0           | 356                        | 406 | 450 | <b>491</b> | 527 | 562 | 594 | 250     | 280 | 308 | <b>336</b> | 363 | 388 | 413 |
| 23.5           | 357                        | 408 | 453 | <b>493</b> | 530 | 564 | 596 | 249     | 278 | 307 | <b>334</b> | 360 | 386 | 410 |
| 24.0           | 358                        | 410 | 455 | <b>495</b> | 532 | 566 | 598 | 248     | 277 | 305 | <b>332</b> | 358 | 383 | 407 |
| 24.5           | 359                        | 412 | 457 | <b>497</b> | 534 | 568 | 600 | 247     | 275 | 303 | <b>329</b> | 355 | 379 | 403 |
| 25.0           | 360                        | 414 | 459 | <b>500</b> | 536 | 570 | 602 | 245     | 274 | 301 | <b>326</b> | 352 | 376 | 400 |

Abbreviation: SRT-WR<sub>peak</sub>=peak work rate attained at the Steep Ramp Test

Supplementary Table 2. Age- and sex-related reference centiles for SRT-WR<sub>peak</sub> normalized for body mass.

| Age<br>(years) | SRT-WR <sub>peak</sub> (W/kg) |     |     |            |     |     |     |         |     |     |            |     |     |     |
|----------------|-------------------------------|-----|-----|------------|-----|-----|-----|---------|-----|-----|------------|-----|-----|-----|
|                | Males                         |     |     |            |     |     |     | Females |     |     |            |     |     |     |
|                | P3                            | P10 | P25 | <b>P50</b> | P75 | P90 | P97 | P3      | P10 | P25 | <b>P50</b> | P75 | P90 | P97 |
| 8.0            | 3.1                           | 3.7 | 4.2 | <b>4.7</b> | 5.1 | 5.4 | 5.8 | 3.3     | 3.7 | 4.1 | <b>4.6</b> | 5.1 | 5.7 | 6.3 |
| 8.5            | 3.2                           | 3.8 | 4.3 | <b>4.7</b> | 5.1 | 5.5 | 5.8 | 3.3     | 3.8 | 4.2 | <b>4.7</b> | 5.2 | 5.7 | 6.3 |
| 9.0            | 3.3                           | 3.9 | 4.4 | <b>4.8</b> | 5.2 | 5.6 | 5.9 | 3.4     | 3.8 | 4.3 | <b>4.7</b> | 5.2 | 5.8 | 6.4 |
| 9.5            | 3.4                           | 4.0 | 4.5 | <b>4.9</b> | 5.3 | 5.7 | 6.0 | 3.4     | 3.9 | 4.3 | <b>4.8</b> | 5.3 | 5.8 | 6.4 |
| 10.0           | 3.5                           | 4.1 | 4.6 | <b>5.0</b> | 5.4 | 5.8 | 6.1 | 3.5     | 3.9 | 4.4 | <b>4.9</b> | 5.4 | 5.9 | 6.4 |
| 10.5           | 3.6                           | 4.2 | 4.7 | <b>5.1</b> | 5.5 | 5.9 | 6.3 | 3.5     | 4.0 | 4.4 | <b>4.9</b> | 5.4 | 5.9 | 6.4 |
| 11.0           | 3.6                           | 4.3 | 4.8 | <b>5.2</b> | 5.6 | 6.0 | 6.4 | 3.5     | 4.0 | 4.5 | <b>5.0</b> | 5.5 | 6.0 | 6.5 |
| 11.5           | 3.7                           | 4.3 | 4.9 | <b>5.3</b> | 5.7 | 6.1 | 6.5 | 3.6     | 4.1 | 4.5 | <b>5.0</b> | 5.5 | 6.0 | 6.5 |
| 12.0           | 3.8                           | 4.4 | 5.0 | <b>5.4</b> | 5.8 | 6.2 | 6.6 | 3.6     | 4.1 | 4.6 | <b>5.1</b> | 5.6 | 6.0 | 6.5 |
| 12.5           | 3.9                           | 4.5 | 5.1 | <b>5.5</b> | 5.9 | 6.3 | 6.7 | 3.7     | 4.1 | 4.6 | <b>5.1</b> | 5.6 | 6.1 | 6.5 |
| 13.0           | 4.0                           | 4.6 | 5.1 | <b>5.6</b> | 6.0 | 6.4 | 6.8 | 3.7     | 4.2 | 4.7 | <b>5.2</b> | 5.6 | 6.1 | 6.5 |
| 13.5           | 4.0                           | 4.7 | 5.2 | <b>5.7</b> | 6.1 | 6.5 | 6.9 | 3.7     | 4.2 | 4.7 | <b>5.2</b> | 5.6 | 6.1 | 6.5 |
| 14.0           | 4.1                           | 4.8 | 5.3 | <b>5.8</b> | 6.2 | 6.6 | 7.0 | 3.7     | 4.2 | 4.7 | <b>5.2</b> | 5.6 | 6.1 | 6.5 |
| 14.5           | 4.2                           | 4.9 | 5.4 | <b>5.9</b> | 6.3 | 6.7 | 7.1 | 3.7     | 4.2 | 4.7 | <b>5.2</b> | 5.6 | 6.0 | 6.4 |
| 15.0           | 4.3                           | 4.9 | 5.5 | <b>6.0</b> | 6.4 | 6.8 | 7.2 | 3.7     | 4.2 | 4.7 | <b>5.2</b> | 5.6 | 6.0 | 6.4 |
| 15.5           | 4.4                           | 5.0 | 5.6 | <b>6.1</b> | 6.5 | 6.9 | 7.3 | 3.7     | 4.2 | 4.7 | <b>5.2</b> | 5.6 | 5.9 | 6.3 |
| 16.0           | 4.5                           | 5.1 | 5.7 | <b>6.2</b> | 6.6 | 7.0 | 7.4 | 3.7     | 4.2 | 4.7 | <b>5.2</b> | 5.6 | 5.9 | 6.3 |
| 16.5           | 4.5                           | 5.2 | 5.7 | <b>6.2</b> | 6.7 | 7.1 | 7.5 | 3.7     | 4.3 | 4.7 | <b>5.2</b> | 5.5 | 5.9 | 6.2 |
| 17.0           | 4.6                           | 5.2 | 5.8 | <b>6.3</b> | 6.7 | 7.1 | 7.5 | 3.8     | 4.3 | 4.8 | <b>5.2</b> | 5.5 | 5.9 | 6.2 |
| 17.5           | 4.7                           | 5.3 | 5.8 | <b>6.3</b> | 6.8 | 7.2 | 7.6 | 3.8     | 4.3 | 4.8 | <b>5.2</b> | 5.6 | 5.9 | 6.2 |
| 18.0           | 4.7                           | 5.3 | 5.9 | <b>6.3</b> | 6.8 | 7.2 | 7.6 | 3.8     | 4.4 | 4.8 | <b>5.2</b> | 5.6 | 5.9 | 6.2 |
| 18.5           | 4.8                           | 5.3 | 5.9 | <b>6.3</b> | 6.8 | 7.2 | 7.6 | 3.9     | 4.4 | 4.9 | <b>5.2</b> | 5.6 | 5.9 | 6.2 |
| 19.0           | 4.8                           | 5.4 | 5.9 | <b>6.3</b> | 6.8 | 7.2 | 7.6 | 3.9     | 4.5 | 4.9 | <b>5.3</b> | 5.6 | 5.9 | 6.2 |
| 19.5           | 4.8                           | 5.4 | 5.9 | <b>6.3</b> | 6.8 | 7.2 | 7.6 | 4.0     | 4.5 | 4.9 | <b>5.3</b> | 5.7 | 6.0 | 6.2 |
| 20.0           | 4.9                           | 5.4 | 5.9 | <b>6.3</b> | 6.8 | 7.2 | 7.5 | 4.0     | 4.5 | 5.0 | <b>5.4</b> | 5.7 | 6.0 | 6.2 |
| 20.5           | 4.9                           | 5.4 | 5.9 | <b>6.3</b> | 6.7 | 7.1 | 7.5 | 4.1     | 4.6 | 5.0 | <b>5.4</b> | 5.7 | 6.0 | 6.3 |
| 21.0           | 4.9                           | 5.4 | 5.8 | <b>6.3</b> | 6.7 | 7.1 | 7.5 | 4.1     | 4.6 | 5.1 | <b>5.4</b> | 5.7 | 6.0 | 6.3 |
| 21.5           | 4.9                           | 5.4 | 5.8 | <b>6.3</b> | 6.7 | 7.1 | 7.5 | 4.1     | 4.7 | 5.1 | <b>5.4</b> | 5.8 | 6.0 | 6.3 |
| 22.0           | 4.9                           | 5.4 | 5.8 | <b>6.2</b> | 6.6 | 7.0 | 7.4 | 4.1     | 4.7 | 5.1 | <b>5.5</b> | 5.8 | 6.0 | 6.3 |
| 22.5           | 4.9                           | 5.4 | 5.8 | <b>6.2</b> | 6.6 | 7.0 | 7.4 | 4.1     | 4.7 | 5.1 | <b>5.5</b> | 5.8 | 6.1 | 6.3 |
| 23.0           | 4.9                           | 5.4 | 5.8 | <b>6.2</b> | 6.6 | 7.0 | 7.4 | 4.1     | 4.7 | 5.2 | <b>5.5</b> | 5.8 | 6.1 | 6.3 |
| 23.5           | 4.9                           | 5.4 | 5.8 | <b>6.2</b> | 6.6 | 7.0 | 7.4 | 4.1     | 4.7 | 5.2 | <b>5.5</b> | 5.8 | 6.1 | 6.3 |
| 24.0           | 5.0                           | 5.4 | 5.8 | <b>6.2</b> | 6.6 | 7.0 | 7.4 | 4.1     | 4.7 | 5.2 | <b>5.5</b> | 5.8 | 6.1 | 6.3 |
| 24.5           | 5.0                           | 5.4 | 5.8 | <b>6.2</b> | 6.6 | 7.0 | 7.4 | 4.1     | 4.8 | 5.2 | <b>5.5</b> | 5.8 | 6.1 | 6.3 |
| 25.0           | 5.0                           | 5.4 | 5.8 | <b>6.2</b> | 6.6 | 7.0 | 7.5 | 4.0     | 4.7 | 5.2 | <b>5.5</b> | 5.8 | 6.1 | 6.3 |

Abbreviation: SRT-WR<sub>peak</sub>=peak work rate attained at the Steep Ramp Test

Supplementary Table 3. Age- and sex-related reference centiles for SRT-WR<sub>peak</sub> normalized for fat-free mass.

| Age<br>(years) | SRT-WR <sub>peak</sub> (W/kg FFM) |     |     |            |     |     |     |         |     |     |            |     |     |     |
|----------------|-----------------------------------|-----|-----|------------|-----|-----|-----|---------|-----|-----|------------|-----|-----|-----|
|                | Males                             |     |     |            |     |     |     | Females |     |     |            |     |     |     |
|                | P3                                | P10 | P25 | <b>P50</b> | P75 | P90 | P97 | P3      | P10 | P25 | <b>P50</b> | P75 | P90 | P97 |
| 8.0            | 4.3                               | 4.9 | 5.3 | <b>5.7</b> | 6.0 | 6.3 | 6.6 | 4.8     | 5.1 | 5.5 | <b>5.9</b> | 6.4 | 6.9 | 7.4 |
| 8.5            | 4.4                               | 5.0 | 5.4 | <b>5.8</b> | 6.1 | 6.4 | 6.7 | 4.8     | 5.2 | 5.6 | <b>6.0</b> | 6.5 | 6.9 | 7.5 |
| 9.0            | 4.5                               | 5.1 | 5.5 | <b>5.9</b> | 6.2 | 6.5 | 6.8 | 4.9     | 5.2 | 5.6 | <b>6.1</b> | 6.5 | 7.0 | 7.5 |
| 9.5            | 4.6                               | 5.2 | 5.6 | <b>6.0</b> | 6.4 | 6.7 | 7.0 | 4.9     | 5.3 | 5.7 | <b>6.1</b> | 6.6 | 7.1 | 7.6 |
| 10.0           | 4.8                               | 5.3 | 5.7 | <b>6.1</b> | 6.5 | 6.8 | 7.1 | 5.0     | 5.4 | 5.8 | <b>6.2</b> | 6.7 | 7.1 | 7.6 |
| 10.5           | 4.9                               | 5.4 | 5.8 | <b>6.3</b> | 6.6 | 7.0 | 7.3 | 5.0     | 5.4 | 5.8 | <b>6.3</b> | 6.7 | 7.2 | 7.7 |
| 11.0           | 5.0                               | 5.5 | 6.0 | <b>6.4</b> | 6.7 | 7.1 | 7.4 | 5.0     | 5.5 | 5.9 | <b>6.4</b> | 6.8 | 7.3 | 7.7 |
| 11.5           | 5.1                               | 5.6 | 6.1 | <b>6.5</b> | 6.9 | 7.2 | 7.6 | 5.1     | 5.5 | 6.0 | <b>6.4</b> | 6.9 | 7.3 | 7.8 |
| 12.0           | 5.2                               | 5.7 | 6.2 | <b>6.6</b> | 7.0 | 7.4 | 7.7 | 5.1     | 5.6 | 6.0 | <b>6.5</b> | 7.0 | 7.4 | 7.9 |
| 12.5           | 5.2                               | 5.8 | 6.2 | <b>6.7</b> | 7.1 | 7.5 | 7.8 | 5.1     | 5.6 | 6.1 | <b>6.5</b> | 7.0 | 7.5 | 7.9 |
| 13.0           | 5.3                               | 5.9 | 6.3 | <b>6.8</b> | 7.2 | 7.6 | 8.0 | 5.1     | 5.6 | 6.1 | <b>6.6</b> | 7.1 | 7.5 | 8.0 |
| 13.5           | 5.4                               | 5.9 | 6.4 | <b>6.9</b> | 7.3 | 7.7 | 8.1 | 5.1     | 5.7 | 6.2 | <b>6.6</b> | 7.1 | 7.6 | 8.0 |
| 14.0           | 5.5                               | 6.0 | 6.5 | <b>7.0</b> | 7.4 | 7.8 | 8.2 | 5.2     | 5.7 | 6.2 | <b>6.7</b> | 7.1 | 7.6 | 8.0 |
| 14.5           | 5.6                               | 6.1 | 6.6 | <b>7.0</b> | 7.5 | 7.9 | 8.4 | 5.2     | 5.7 | 6.2 | <b>6.7</b> | 7.2 | 7.6 | 8.0 |
| 15.0           | 5.7                               | 6.2 | 6.6 | <b>7.1</b> | 7.6 | 8.0 | 8.5 | 5.2     | 5.7 | 6.2 | <b>6.7</b> | 7.2 | 7.6 | 8.1 |
| 15.5           | 5.7                               | 6.2 | 6.7 | <b>7.2</b> | 7.7 | 8.1 | 8.6 | 5.2     | 5.7 | 6.2 | <b>6.7</b> | 7.2 | 7.6 | 8.1 |
| 16.0           | 5.8                               | 6.3 | 6.8 | <b>7.2</b> | 7.7 | 8.2 | 8.7 | 5.2     | 5.7 | 6.3 | <b>6.7</b> | 7.2 | 7.7 | 8.1 |
| 16.5           | 5.9                               | 6.3 | 6.8 | <b>7.3</b> | 7.8 | 8.3 | 8.8 | 5.2     | 5.8 | 6.3 | <b>6.8</b> | 7.2 | 7.7 | 8.1 |
| 17.0           | 5.9                               | 6.4 | 6.8 | <b>7.3</b> | 7.8 | 8.3 | 8.8 | 5.2     | 5.8 | 6.3 | <b>6.8</b> | 7.3 | 7.7 | 8.1 |
| 17.5           | 6.0                               | 6.4 | 6.9 | <b>7.3</b> | 7.8 | 8.3 | 8.9 | 5.3     | 5.8 | 6.4 | <b>6.9</b> | 7.3 | 7.8 | 8.2 |
| 18.0           | 6.0                               | 6.4 | 6.9 | <b>7.3</b> | 7.8 | 8.4 | 8.9 | 5.3     | 5.9 | 6.4 | <b>6.9</b> | 7.4 | 7.8 | 8.3 |
| 18.5           | 6.0                               | 6.4 | 6.9 | <b>7.3</b> | 7.8 | 8.4 | 8.9 | 5.4     | 5.9 | 6.5 | <b>7.0</b> | 7.4 | 7.9 | 8.3 |
| 19.0           | 6.0                               | 6.4 | 6.8 | <b>7.3</b> | 7.8 | 8.3 | 8.9 | 5.5     | 6.0 | 6.5 | <b>7.0</b> | 7.5 | 7.9 | 8.4 |
| 19.5           | 6.0                               | 6.4 | 6.8 | <b>7.3</b> | 7.8 | 8.3 | 8.9 | 5.5     | 6.1 | 6.6 | <b>7.1</b> | 7.6 | 8.0 | 8.4 |
| 20.0           | 6.0                               | 6.4 | 6.8 | <b>7.3</b> | 7.8 | 8.3 | 8.9 | 5.6     | 6.1 | 6.7 | <b>7.2</b> | 7.6 | 8.1 | 8.5 |
| 20.5           | 6.0                               | 6.4 | 6.8 | <b>7.2</b> | 7.7 | 8.3 | 8.8 | 5.6     | 6.2 | 6.7 | <b>7.2</b> | 7.7 | 8.1 | 8.6 |
| 21.0           | 6.0                               | 6.3 | 6.7 | <b>7.2</b> | 7.7 | 8.2 | 8.8 | 5.7     | 6.2 | 6.8 | <b>7.3</b> | 7.7 | 8.2 | 8.6 |
| 21.5           | 5.9                               | 6.3 | 6.7 | <b>7.1</b> | 7.6 | 8.2 | 8.8 | 5.7     | 6.3 | 6.8 | <b>7.3</b> | 7.8 | 8.2 | 8.7 |
| 22.0           | 5.9                               | 6.3 | 6.7 | <b>7.1</b> | 7.6 | 8.1 | 8.8 | 5.7     | 6.3 | 6.9 | <b>7.4</b> | 7.8 | 8.3 | 8.7 |
| 22.5           | 5.9                               | 6.2 | 6.6 | <b>7.1</b> | 7.6 | 8.1 | 8.7 | 5.7     | 6.3 | 6.9 | <b>7.4</b> | 7.9 | 8.3 | 8.7 |
| 23.0           | 5.9                               | 6.2 | 6.6 | <b>7.0</b> | 7.5 | 8.1 | 8.7 | 5.7     | 6.4 | 6.9 | <b>7.4</b> | 7.9 | 8.3 | 8.8 |
| 23.5           | 5.8                               | 6.2 | 6.5 | <b>7.0</b> | 7.5 | 8.0 | 8.7 | 5.7     | 6.4 | 7.0 | <b>7.5</b> | 7.9 | 8.4 | 8.8 |
| 24.0           | 5.8                               | 6.1 | 6.5 | <b>6.9</b> | 7.4 | 8.0 | 8.7 | 5.7     | 6.4 | 7.0 | <b>7.5</b> | 8.0 | 8.4 | 8.8 |
| 24.5           | 5.8                               | 6.1 | 6.5 | <b>6.9</b> | 7.4 | 8.0 | 8.7 | 5.7     | 6.4 | 7.0 | <b>7.5</b> | 8.0 | 8.4 | 8.8 |
| 25.0           | 5.8                               | 6.1 | 6.4 | <b>6.8</b> | 7.3 | 7.9 | 8.7 | 5.7     | 6.4 | 7.0 | <b>7.6</b> | 8.0 | 8.5 | 8.8 |

Abbreviations: FFM=fat-free mass; SRT-WR<sub>peak</sub>=peak work rate attained at the Steep Ramp Test

Supplementary Table 4. Body height- and sex-related reference centiles for absolute SRT- $WR_{peak}$ .

| Body height<br>(cm) | SRT- $WR_{peak}$ (W) |     |     |            |     |     |     |         |     |     |            |     |     |     |
|---------------------|----------------------|-----|-----|------------|-----|-----|-----|---------|-----|-----|------------|-----|-----|-----|
|                     | Males                |     |     |            |     |     |     | Females |     |     |            |     |     |     |
|                     | P3                   | P10 | P25 | <b>P50</b> | P75 | P90 | P97 | P3      | P10 | P25 | <b>P50</b> | P75 | P90 | P97 |
| 125                 | 124                  | 128 | 131 | <b>134</b> | 137 | 140 | 142 | 110     | 116 | 121 | <b>126</b> | 130 | 134 | 138 |
| 127                 | 125                  | 130 | 134 | <b>138</b> | 142 | 145 | 148 | 110     | 117 | 122 | <b>128</b> | 132 | 137 | 141 |
| 129                 | 126                  | 132 | 137 | <b>142</b> | 146 | 150 | 153 | 110     | 117 | 124 | <b>130</b> | 135 | 140 | 145 |
| 131                 | 127                  | 134 | 141 | <b>146</b> | 151 | 155 | 159 | 111     | 119 | 126 | <b>133</b> | 139 | 144 | 150 |
| 133                 | 128                  | 136 | 144 | <b>150</b> | 155 | 160 | 165 | 113     | 121 | 129 | <b>137</b> | 143 | 149 | 155 |
| 135                 | 129                  | 139 | 147 | <b>154</b> | 161 | 166 | 171 | 115     | 125 | 133 | <b>141</b> | 149 | 156 | 162 |
| 137                 | 131                  | 142 | 151 | <b>159</b> | 166 | 173 | 179 | 118     | 128 | 138 | <b>147</b> | 155 | 163 | 170 |
| 139                 | 133                  | 146 | 156 | <b>165</b> | 173 | 180 | 187 | 122     | 133 | 143 | <b>153</b> | 162 | 171 | 179 |
| 141                 | 137                  | 150 | 161 | <b>171</b> | 180 | 188 | 196 | 126     | 138 | 150 | <b>160</b> | 171 | 180 | 190 |
| 143                 | 141                  | 155 | 167 | <b>178</b> | 188 | 197 | 206 | 132     | 145 | 157 | <b>169</b> | 180 | 191 | 202 |
| 145                 | 147                  | 161 | 174 | <b>186</b> | 197 | 207 | 217 | 138     | 152 | 165 | <b>178</b> | 190 | 203 | 215 |
| 147                 | 154                  | 168 | 182 | <b>195</b> | 207 | 219 | 230 | 145     | 160 | 174 | <b>188</b> | 202 | 215 | 229 |
| 149                 | 161                  | 176 | 191 | <b>205</b> | 219 | 232 | 245 | 153     | 168 | 183 | <b>198</b> | 214 | 229 | 245 |
| 151                 | 170                  | 185 | 200 | <b>216</b> | 231 | 246 | 261 | 162     | 178 | 194 | <b>210</b> | 227 | 244 | 261 |
| 153                 | 178                  | 194 | 210 | <b>227</b> | 244 | 261 | 278 | 171     | 187 | 204 | <b>222</b> | 240 | 259 | 278 |
| 155                 | 187                  | 204 | 221 | <b>239</b> | 257 | 276 | 295 | 181     | 198 | 215 | <b>234</b> | 253 | 274 | 296 |
| 157                 | 196                  | 214 | 232 | <b>251</b> | 271 | 291 | 313 | 191     | 208 | 226 | <b>246</b> | 267 | 290 | 314 |
| 159                 | 206                  | 224 | 244 | <b>264</b> | 285 | 308 | 331 | 202     | 219 | 238 | <b>258</b> | 280 | 305 | 332 |
| 161                 | 216                  | 235 | 256 | <b>277</b> | 300 | 324 | 350 | 212     | 230 | 249 | <b>270</b> | 294 | 320 | 349 |
| 163                 | 227                  | 247 | 268 | <b>291</b> | 316 | 342 | 369 | 223     | 240 | 260 | <b>281</b> | 306 | 333 | 364 |
| 165                 | 237                  | 259 | 281 | <b>306</b> | 332 | 359 | 389 | 232     | 250 | 270 | <b>292</b> | 317 | 345 | 378 |
| 167                 | 249                  | 271 | 295 | <b>320</b> | 348 | 377 | 408 | 241     | 259 | 280 | <b>302</b> | 327 | 356 | 389 |
| 169                 | 260                  | 283 | 308 | <b>335</b> | 364 | 395 | 428 | 250     | 268 | 289 | <b>312</b> | 337 | 366 | 398 |
| 171                 | 271                  | 296 | 322 | <b>351</b> | 381 | 413 | 447 | 258     | 277 | 298 | <b>321</b> | 346 | 374 | 406 |
| 173                 | 283                  | 309 | 336 | <b>366</b> | 397 | 430 | 466 | 267     | 286 | 307 | <b>329</b> | 354 | 382 | 412 |
| 175                 | 294                  | 321 | 350 | <b>381</b> | 413 | 448 | 484 | 275     | 294 | 315 | <b>338</b> | 363 | 389 | 419 |
| 177                 | 305                  | 334 | 364 | <b>396</b> | 429 | 465 | 502 | 284     | 303 | 324 | <b>347</b> | 371 | 397 | 425 |
| 179                 | 316                  | 346 | 378 | <b>411</b> | 446 | 482 | 519 | 293     | 313 | 334 | <b>356</b> | 380 | 405 | 431 |
| 181                 | 327                  | 359 | 392 | <b>426</b> | 462 | 499 | 537 | 302     | 322 | 343 | <b>365</b> | 388 | 412 | 438 |
| 183                 | 337                  | 371 | 406 | <b>442</b> | 478 | 515 | 554 | 312     | 332 | 353 | <b>374</b> | 397 | 420 | 444 |
| 185                 | 348                  | 383 | 420 | <b>457</b> | 494 | 532 | 570 | 322     | 342 | 363 | <b>384</b> | 405 | 428 | 450 |
| 187                 | 357                  | 395 | 434 | <b>472</b> | 510 | 548 | 586 | 333     | 352 | 372 | <b>393</b> | 414 | 435 | 457 |
| 189                 | 367                  | 407 | 447 | <b>487</b> | 525 | 564 | 602 | 343     | 363 | 382 | <b>402</b> | 422 | 443 | 463 |
| 191                 | 376                  | 419 | 461 | <b>501</b> | 541 | 579 | 617 | 353     | 373 | 392 | <b>412</b> | 431 | 450 | 470 |
| 193                 | 385                  | 430 | 474 | <b>516</b> | 556 | 595 | 633 | 364     | 383 | 402 | <b>421</b> | 439 | 458 | 476 |
| 195                 | 393                  | 442 | 487 | <b>530</b> | 571 | 610 | 648 | 374     | 393 | 412 | <b>430</b> | 448 | 466 | 483 |

Abbreviation: SRT- $WR_{peak}$ =peak work rate attained at the Steep Ramp Test

Supplementary Table 5. Body height- and sex-related reference centiles for SRT-WR<sub>peak</sub> normalized for body mass.

| Body height<br>(cm) | SRT-WR <sub>peak</sub> (W/kg) |     |     |            |     |     |     |         |     |     |            |     |     |     |
|---------------------|-------------------------------|-----|-----|------------|-----|-----|-----|---------|-----|-----|------------|-----|-----|-----|
|                     | Males                         |     |     |            |     |     |     | Females |     |     |            |     |     |     |
|                     | P3                            | P10 | P25 | <b>P50</b> | P75 | P90 | P97 | P3      | P10 | P25 | <b>P50</b> | P75 | P90 | P97 |
| 125                 | 3.3                           | 4.0 | 4.5 | <b>5.0</b> | 5.5 | 5.9 | 6.2 | 3.3     | 3.7 | 4.2 | <b>4.8</b> | 5.4 | 6.0 | 6.8 |
| 127                 | 3.2                           | 3.9 | 4.5 | <b>5.0</b> | 5.4 | 5.8 | 6.2 | 3.3     | 3.7 | 4.2 | <b>4.7</b> | 5.3 | 5.9 | 6.7 |
| 129                 | 3.2                           | 3.9 | 4.5 | <b>4.9</b> | 5.4 | 5.8 | 6.1 | 3.3     | 3.7 | 4.2 | <b>4.7</b> | 5.3 | 5.9 | 6.6 |
| 131                 | 3.2                           | 3.9 | 4.4 | <b>4.9</b> | 5.3 | 5.7 | 6.1 | 3.3     | 3.7 | 4.2 | <b>4.7</b> | 5.2 | 5.8 | 6.5 |
| 133                 | 3.2                           | 3.9 | 4.4 | <b>4.9</b> | 5.3 | 5.7 | 6.0 | 3.3     | 3.7 | 4.2 | <b>4.7</b> | 5.2 | 5.8 | 6.4 |
| 135                 | 3.2                           | 3.9 | 4.4 | <b>4.9</b> | 5.3 | 5.7 | 6.0 | 3.3     | 3.7 | 4.2 | <b>4.7</b> | 5.2 | 5.8 | 6.4 |
| 137                 | 3.3                           | 3.9 | 4.4 | <b>4.9</b> | 5.3 | 5.7 | 6.0 | 3.3     | 3.8 | 4.2 | <b>4.7</b> | 5.2 | 5.8 | 6.4 |
| 139                 | 3.3                           | 3.9 | 4.4 | <b>4.9</b> | 5.3 | 5.7 | 6.1 | 3.4     | 3.8 | 4.2 | <b>4.7</b> | 5.2 | 5.8 | 6.4 |
| 141                 | 3.3                           | 3.9 | 4.5 | <b>5.0</b> | 5.4 | 5.8 | 6.1 | 3.4     | 3.8 | 4.3 | <b>4.8</b> | 5.3 | 5.8 | 6.4 |
| 143                 | 3.4                           | 4.0 | 4.5 | <b>5.0</b> | 5.4 | 5.8 | 6.2 | 3.4     | 3.9 | 4.3 | <b>4.8</b> | 5.3 | 5.8 | 6.4 |
| 145                 | 3.4                           | 4.1 | 4.6 | <b>5.1</b> | 5.5 | 5.9 | 6.3 | 3.5     | 3.9 | 4.4 | <b>4.8</b> | 5.3 | 5.9 | 6.4 |
| 147                 | 3.5                           | 4.1 | 4.7 | <b>5.2</b> | 5.6 | 6.0 | 6.4 | 3.5     | 4.0 | 4.4 | <b>4.9</b> | 5.4 | 5.9 | 6.4 |
| 149                 | 3.6                           | 4.2 | 4.8 | <b>5.3</b> | 5.7 | 6.2 | 6.6 | 3.6     | 4.0 | 4.5 | <b>5.0</b> | 5.4 | 5.9 | 6.5 |
| 151                 | 3.7                           | 4.3 | 4.9 | <b>5.4</b> | 5.9 | 6.3 | 6.7 | 3.6     | 4.1 | 4.5 | <b>5.0</b> | 5.5 | 6.0 | 6.5 |
| 153                 | 3.7                           | 4.4 | 4.9 | <b>5.5</b> | 6.0 | 6.4 | 6.9 | 3.7     | 4.1 | 4.6 | <b>5.1</b> | 5.5 | 6.0 | 6.5 |
| 155                 | 3.8                           | 4.5 | 5.0 | <b>5.6</b> | 6.1 | 6.5 | 7.0 | 3.7     | 4.2 | 4.6 | <b>5.1</b> | 5.6 | 6.0 | 6.5 |
| 157                 | 3.9                           | 4.5 | 5.1 | <b>5.6</b> | 6.2 | 6.6 | 7.1 | 3.7     | 4.2 | 4.7 | <b>5.2</b> | 5.6 | 6.0 | 6.5 |
| 159                 | 3.9                           | 4.6 | 5.2 | <b>5.7</b> | 6.2 | 6.7 | 7.2 | 3.7     | 4.2 | 4.7 | <b>5.2</b> | 5.6 | 6.1 | 6.5 |
| 161                 | 4.0                           | 4.6 | 5.2 | <b>5.8</b> | 6.3 | 6.8 | 7.3 | 3.8     | 4.3 | 4.8 | <b>5.2</b> | 5.7 | 6.1 | 6.5 |
| 163                 | 4.0                           | 4.7 | 5.3 | <b>5.8</b> | 6.4 | 6.9 | 7.3 | 3.8     | 4.3 | 4.8 | <b>5.3</b> | 5.7 | 6.1 | 6.4 |
| 165                 | 4.1                           | 4.7 | 5.3 | <b>5.9</b> | 6.4 | 6.9 | 7.4 | 3.8     | 4.3 | 4.8 | <b>5.3</b> | 5.7 | 6.1 | 6.4 |
| 167                 | 4.1                           | 4.8 | 5.4 | <b>5.9</b> | 6.5 | 7.0 | 7.4 | 3.8     | 4.4 | 4.9 | <b>5.3</b> | 5.7 | 6.0 | 6.4 |
| 169                 | 4.2                           | 4.8 | 5.4 | <b>6.0</b> | 6.5 | 7.0 | 7.4 | 3.7     | 4.4 | 4.9 | <b>5.3</b> | 5.7 | 6.0 | 6.3 |
| 171                 | 4.2                           | 4.9 | 5.5 | <b>6.0</b> | 6.5 | 7.0 | 7.5 | 3.7     | 4.3 | 4.8 | <b>5.3</b> | 5.6 | 5.9 | 6.2 |
| 173                 | 4.3                           | 4.9 | 5.5 | <b>6.1</b> | 6.6 | 7.0 | 7.5 | 3.7     | 4.3 | 4.8 | <b>5.2</b> | 5.6 | 5.9 | 6.2 |
| 175                 | 4.3                           | 5.0 | 5.6 | <b>6.1</b> | 6.6 | 7.0 | 7.4 | 3.6     | 4.3 | 4.8 | <b>5.2</b> | 5.5 | 5.8 | 6.1 |
| 177                 | 4.4                           | 5.0 | 5.6 | <b>6.1</b> | 6.6 | 7.0 | 7.4 | 3.6     | 4.3 | 4.8 | <b>5.2</b> | 5.5 | 5.8 | 6.0 |
| 179                 | 4.4                           | 5.1 | 5.6 | <b>6.1</b> | 6.6 | 7.0 | 7.4 | 3.5     | 4.3 | 4.8 | <b>5.2</b> | 5.5 | 5.7 | 6.0 |
| 181                 | 4.5                           | 5.1 | 5.6 | <b>6.1</b> | 6.6 | 7.0 | 7.4 | 3.4     | 4.3 | 4.8 | <b>5.1</b> | 5.4 | 5.7 | 5.9 |
| 183                 | 4.6                           | 5.2 | 5.7 | <b>6.2</b> | 6.6 | 7.0 | 7.3 | 3.4     | 4.3 | 4.7 | <b>5.1</b> | 5.4 | 5.6 | 5.8 |
| 185                 | 4.6                           | 5.2 | 5.7 | <b>6.2</b> | 6.6 | 7.0 | 7.3 | 3.3     | 4.2 | 4.7 | <b>5.1</b> | 5.3 | 5.6 | 5.8 |
| 187                 | 4.7                           | 5.3 | 5.8 | <b>6.2</b> | 6.6 | 6.9 | 7.3 | 3.2     | 4.2 | 4.7 | <b>5.0</b> | 5.3 | 5.5 | 5.7 |
| 189                 | 4.8                           | 5.3 | 5.8 | <b>6.2</b> | 6.6 | 6.9 | 7.2 | 3.1     | 4.2 | 4.6 | <b>5.0</b> | 5.2 | 5.4 | 5.6 |
| 191                 | 4.9                           | 5.4 | 5.8 | <b>6.2</b> | 6.5 | 6.9 | 7.2 | 3.0     | 4.1 | 4.6 | <b>4.9</b> | 5.1 | 5.3 | 5.5 |
| 193                 | 5.0                           | 5.4 | 5.8 | <b>6.2</b> | 6.5 | 6.8 | 7.1 | 2.9     | 4.1 | 4.6 | <b>4.9</b> | 5.1 | 5.3 | 5.4 |
| 195                 | 5.1                           | 5.5 | 5.8 | <b>6.2</b> | 6.5 | 6.7 | 7.0 | 2.8     | 4.1 | 4.5 | <b>4.8</b> | 5.0 | 5.2 | 5.3 |

Abbreviation: SRT-WR<sub>peak</sub>=peak work rate attained at the Steep Ramp Test

Supplementary Table 6. Body mass- and sex-related reference centiles for absolute SRT- $WR_{peak}$ .

| Body mass<br>(kg) | SRT- $WR_{peak}$ (W) |     |     |            |     |     |     |         |     |     |            |     |     |     |
|-------------------|----------------------|-----|-----|------------|-----|-----|-----|---------|-----|-----|------------|-----|-----|-----|
|                   | Males                |     |     |            |     |     |     | Females |     |     |            |     |     |     |
|                   | P3                   | P10 | P25 | <b>P50</b> | P75 | P90 | P97 | P3      | P10 | P25 | <b>P50</b> | P75 | P90 | P97 |
| 24                | 88                   | 101 | 113 | <b>124</b> | 134 | 144 | 153 | 89      | 102 | 115 | <b>128</b> | 141 | 154 | 167 |
| 26                | 94                   | 109 | 122 | <b>134</b> | 145 | 156 | 165 | 96      | 109 | 123 | <b>137</b> | 150 | 164 | 178 |
| 28                | 101                  | 117 | 132 | <b>145</b> | 157 | 168 | 178 | 102     | 116 | 131 | <b>145</b> | 160 | 174 | 189 |
| 30                | 107                  | 126 | 141 | <b>155</b> | 168 | 180 | 191 | 108     | 124 | 139 | <b>155</b> | 170 | 185 | 200 |
| 32                | 114                  | 134 | 151 | <b>167</b> | 181 | 193 | 205 | 115     | 132 | 148 | <b>164</b> | 180 | 196 | 211 |
| 34                | 122                  | 143 | 162 | <b>179</b> | 194 | 208 | 220 | 122     | 140 | 157 | <b>174</b> | 190 | 207 | 223 |
| 36                | 129                  | 153 | 174 | <b>192</b> | 208 | 223 | 236 | 129     | 148 | 166 | <b>184</b> | 201 | 218 | 235 |
| 38                | 138                  | 164 | 186 | <b>206</b> | 223 | 239 | 254 | 137     | 157 | 176 | <b>195</b> | 213 | 230 | 247 |
| 40                | 146                  | 175 | 200 | <b>220</b> | 239 | 256 | 272 | 145     | 166 | 186 | <b>206</b> | 224 | 242 | 260 |
| 42                | 156                  | 187 | 213 | <b>236</b> | 256 | 274 | 291 | 153     | 176 | 197 | <b>217</b> | 236 | 254 | 272 |
| 44                | 165                  | 199 | 227 | <b>251</b> | 272 | 292 | 310 | 162     | 185 | 207 | <b>228</b> | 247 | 266 | 285 |
| 46                | 174                  | 211 | 240 | <b>266</b> | 289 | 309 | 328 | 170     | 195 | 217 | <b>239</b> | 259 | 278 | 297 |
| 48                | 184                  | 222 | 254 | <b>281</b> | 304 | 326 | 346 | 179     | 204 | 228 | <b>250</b> | 271 | 290 | 309 |
| 50                | 193                  | 234 | 267 | <b>295</b> | 320 | 343 | 364 | 187     | 214 | 238 | <b>261</b> | 282 | 303 | 322 |
| 52                | 203                  | 246 | 280 | <b>310</b> | 336 | 360 | 382 | 196     | 224 | 249 | <b>272</b> | 294 | 315 | 334 |
| 54                | 214                  | 258 | 293 | <b>324</b> | 352 | 377 | 400 | 205     | 234 | 259 | <b>283</b> | 305 | 326 | 346 |
| 56                | 225                  | 270 | 306 | <b>338</b> | 367 | 393 | 417 | 214     | 243 | 269 | <b>294</b> | 316 | 338 | 358 |
| 58                | 237                  | 282 | 319 | <b>352</b> | 382 | 409 | 434 | 222     | 252 | 279 | <b>304</b> | 327 | 348 | 369 |
| 60                | 249                  | 294 | 332 | <b>366</b> | 396 | 424 | 451 | 229     | 260 | 288 | <b>313</b> | 336 | 358 | 379 |
| 62                | 260                  | 305 | 344 | <b>379</b> | 410 | 439 | 466 | 235     | 267 | 295 | <b>321</b> | 345 | 367 | 388 |
| 64                | 270                  | 316 | 356 | <b>391</b> | 424 | 454 | 482 | 241     | 273 | 302 | <b>328</b> | 353 | 375 | 396 |
| 66                | 280                  | 327 | 367 | <b>403</b> | 437 | 467 | 496 | 245     | 279 | 308 | <b>335</b> | 359 | 382 | 403 |
| 68                | 290                  | 337 | 378 | <b>415</b> | 449 | 481 | 510 | 249     | 283 | 313 | <b>340</b> | 365 | 387 | 409 |
| 70                | 299                  | 347 | 389 | <b>427</b> | 461 | 494 | 524 | 252     | 287 | 318 | <b>345</b> | 369 | 392 | 413 |
| 72                | 308                  | 357 | 399 | <b>438</b> | 473 | 506 | 537 | 255     | 291 | 321 | <b>349</b> | 373 | 396 | 417 |
| 74                | 316                  | 366 | 409 | <b>449</b> | 485 | 518 | 549 | 258     | 294 | 325 | <b>352</b> | 376 | 399 | 420 |
| 76                | 323                  | 374 | 419 | <b>459</b> | 495 | 529 | 561 | 260     | 297 | 328 | <b>355</b> | 379 | 401 | 422 |
| 78                | 329                  | 382 | 427 | <b>468</b> | 505 | 539 | 571 | 263     | 299 | 330 | <b>357</b> | 381 | 404 | 424 |
| 80                | 333                  | 388 | 435 | <b>477</b> | 514 | 549 | 581 | 266     | 302 | 333 | <b>360</b> | 384 | 405 | 426 |
| 82                | 337                  | 394 | 442 | <b>484</b> | 522 | 557 | 589 | 269     | 305 | 336 | <b>362</b> | 386 | 407 | 427 |
| 84                | 339                  | 399 | 448 | <b>491</b> | 529 | 564 | 596 | 272     | 308 | 338 | <b>365</b> | 388 | 409 | 429 |
| 86                | 340                  | 403 | 453 | <b>497</b> | 535 | 570 | 602 | 276     | 311 | 341 | <b>367</b> | 390 | 411 | 431 |
| 88                | 340                  | 406 | 458 | <b>502</b> | 541 | 575 | 607 | 279     | 315 | 344 | <b>370</b> | 393 | 413 | 432 |
| 90                | 339                  | 409 | 462 | <b>507</b> | 546 | 580 | 612 | 283     | 318 | 348 | <b>373</b> | 395 | 416 | 434 |
| 92                | 337                  | 411 | 466 | <b>511</b> | 550 | 584 | 616 | 288     | 322 | 351 | <b>376</b> | 398 | 418 | 436 |
| 94                | 334                  | 412 | 469 | <b>515</b> | 554 | 588 | 619 | 292     | 326 | 355 | <b>379</b> | 401 | 421 | 439 |
| 96                | 329                  | 414 | 473 | <b>519</b> | 558 | 592 | 623 | 296     | 330 | 358 | <b>382</b> | 404 | 423 | 441 |
| 98                | 322                  | 415 | 476 | <b>523</b> | 562 | 596 | 626 | 301     | 334 | 362 | <b>386</b> | 407 | 426 | 443 |
| 100               | 313                  | 415 | 478 | <b>526</b> | 566 | 599 | 629 | 306     | 339 | 366 | <b>389</b> | 410 | 428 | 445 |

Abbreviation: SRT- $WR_{peak}$ =peak work rate attained at the Steep Ramp Test

Supplementary Table 7. Body mass- and sex-related reference centiles for SRT-WR<sub>peak</sub> normalized for body mass.

| Body mass<br>(kg) | SRT-WR <sub>peak</sub> (W/kg) |     |     |            |     |     |     |         |     |     |            |     |     |     |
|-------------------|-------------------------------|-----|-----|------------|-----|-----|-----|---------|-----|-----|------------|-----|-----|-----|
|                   | Males                         |     |     |            |     |     |     | Females |     |     |            |     |     |     |
|                   | P3                            | P10 | P25 | <b>P50</b> | P75 | P90 | P97 | P3      | P10 | P25 | <b>P50</b> | P75 | P90 | P97 |
| 24                | 3.8                           | 4.3 | 4.7 | <b>5.1</b> | 5.5 | 5.8 | 6.2 | 3.6     | 4.1 | 4.7 | <b>5.2</b> | 5.8 | 6.3 | 6.8 |
| 26                | 3.8                           | 4.3 | 4.7 | <b>5.1</b> | 5.5 | 5.9 | 6.3 | 3.6     | 4.1 | 4.7 | <b>5.2</b> | 5.7 | 6.2 | 6.8 |
| 28                | 3.8                           | 4.3 | 4.7 | <b>5.2</b> | 5.6 | 5.9 | 6.3 | 3.6     | 4.1 | 4.6 | <b>5.2</b> | 5.7 | 6.2 | 6.7 |
| 30                | 3.8                           | 4.3 | 4.7 | <b>5.2</b> | 5.6 | 6.0 | 6.4 | 3.6     | 4.1 | 4.6 | <b>5.2</b> | 5.7 | 6.2 | 6.7 |
| 32                | 3.8                           | 4.3 | 4.8 | <b>5.2</b> | 5.7 | 6.1 | 6.4 | 3.6     | 4.1 | 4.6 | <b>5.1</b> | 5.6 | 6.1 | 6.6 |
| 34                | 3.7                           | 4.3 | 4.8 | <b>5.3</b> | 5.7 | 6.1 | 6.5 | 3.6     | 4.1 | 4.6 | <b>5.1</b> | 5.6 | 6.1 | 6.6 |
| 36                | 3.7                           | 4.3 | 4.9 | <b>5.3</b> | 5.8 | 6.2 | 6.6 | 3.6     | 4.1 | 4.6 | <b>5.1</b> | 5.6 | 6.1 | 6.5 |
| 38                | 3.7                           | 4.4 | 4.9 | <b>5.4</b> | 5.9 | 6.3 | 6.7 | 3.6     | 4.1 | 4.6 | <b>5.1</b> | 5.6 | 6.1 | 6.5 |
| 40                | 3.8                           | 4.4 | 5.0 | <b>5.5</b> | 6.0 | 6.4 | 6.8 | 3.6     | 4.2 | 4.7 | <b>5.2</b> | 5.6 | 6.1 | 6.5 |
| 42                | 3.8                           | 4.5 | 5.1 | <b>5.6</b> | 6.1 | 6.5 | 7.0 | 3.6     | 4.2 | 4.7 | <b>5.2</b> | 5.6 | 6.1 | 6.5 |
| 44                | 3.8                           | 4.5 | 5.1 | <b>5.7</b> | 6.2 | 6.6 | 7.1 | 3.7     | 4.2 | 4.7 | <b>5.2</b> | 5.6 | 6.0 | 6.5 |
| 46                | 3.8                           | 4.6 | 5.2 | <b>5.7</b> | 6.3 | 6.7 | 7.2 | 3.7     | 4.2 | 4.7 | <b>5.2</b> | 5.6 | 6.0 | 6.4 |
| 48                | 3.9                           | 4.6 | 5.2 | <b>5.8</b> | 6.3 | 6.8 | 7.3 | 3.7     | 4.3 | 4.7 | <b>5.2</b> | 5.6 | 6.0 | 6.4 |
| 50                | 3.9                           | 4.7 | 5.3 | <b>5.9</b> | 6.4 | 6.9 | 7.3 | 3.7     | 4.3 | 4.8 | <b>5.2</b> | 5.6 | 6.0 | 6.4 |
| 52                | 3.9                           | 4.7 | 5.4 | <b>5.9</b> | 6.5 | 6.9 | 7.4 | 3.8     | 4.3 | 4.8 | <b>5.2</b> | 5.6 | 6.0 | 6.4 |
| 54                | 4.0                           | 4.8 | 5.4 | <b>6.0</b> | 6.5 | 7.0 | 7.4 | 3.8     | 4.3 | 4.8 | <b>5.2</b> | 5.7 | 6.0 | 6.4 |
| 56                | 4.0                           | 4.8 | 5.4 | <b>6.0</b> | 6.5 | 7.0 | 7.5 | 3.8     | 4.3 | 4.8 | <b>5.2</b> | 5.7 | 6.0 | 6.4 |
| 58                | 4.1                           | 4.8 | 5.5 | <b>6.1</b> | 6.6 | 7.1 | 7.5 | 3.8     | 4.4 | 4.8 | <b>5.2</b> | 5.6 | 6.0 | 6.4 |
| 60                | 4.2                           | 4.9 | 5.5 | <b>6.1</b> | 6.6 | 7.1 | 7.5 | 3.8     | 4.4 | 4.8 | <b>5.2</b> | 5.6 | 6.0 | 6.3 |
| 62                | 4.2                           | 4.9 | 5.5 | <b>6.1</b> | 6.6 | 7.1 | 7.5 | 3.8     | 4.3 | 4.8 | <b>5.2</b> | 5.6 | 5.9 | 6.3 |
| 64                | 4.2                           | 5.0 | 5.6 | <b>6.1</b> | 6.6 | 7.1 | 7.5 | 3.8     | 4.3 | 4.7 | <b>5.2</b> | 5.5 | 5.9 | 6.2 |
| 66                | 4.3                           | 5.0 | 5.6 | <b>6.1</b> | 6.6 | 7.1 | 7.5 | 3.7     | 4.2 | 4.7 | <b>5.1</b> | 5.5 | 5.8 | 6.1 |
| 68                | 4.3                           | 5.0 | 5.6 | <b>6.1</b> | 6.6 | 7.1 | 7.5 | 3.7     | 4.2 | 4.6 | <b>5.0</b> | 5.4 | 5.7 | 6.0 |
| 70                | 4.3                           | 5.0 | 5.6 | <b>6.1</b> | 6.6 | 7.0 | 7.5 | 3.6     | 4.1 | 4.6 | <b>4.9</b> | 5.3 | 5.6 | 5.9 |
| 72                | 4.3                           | 5.0 | 5.6 | <b>6.1</b> | 6.6 | 7.0 | 7.4 | 3.5     | 4.0 | 4.5 | <b>4.8</b> | 5.2 | 5.5 | 5.8 |
| 74                | 4.4                           | 5.0 | 5.6 | <b>6.1</b> | 6.6 | 7.0 | 7.4 | 3.5     | 4.0 | 4.4 | <b>4.7</b> | 5.1 | 5.4 | 5.6 |
| 76                | 4.3                           | 5.0 | 5.6 | <b>6.1</b> | 6.5 | 7.0 | 7.4 | 3.4     | 3.9 | 4.3 | <b>4.6</b> | 4.9 | 5.2 | 5.5 |
| 78                | 4.3                           | 5.0 | 5.5 | <b>6.1</b> | 6.5 | 6.9 | 7.3 | 3.3     | 3.8 | 4.2 | <b>4.5</b> | 4.8 | 5.1 | 5.4 |
| 80                | 4.3                           | 4.9 | 5.5 | <b>6.0</b> | 6.5 | 6.9 | 7.3 | 3.3     | 3.7 | 4.1 | <b>4.4</b> | 4.7 | 5.0 | 5.2 |
| 82                | 4.3                           | 4.9 | 5.4 | <b>5.9</b> | 6.4 | 6.8 | 7.2 | 3.2     | 3.7 | 4.0 | <b>4.3</b> | 4.6 | 4.9 | 5.1 |
| 84                | 4.2                           | 4.8 | 5.4 | <b>5.9</b> | 6.3 | 6.7 | 7.1 | 3.2     | 3.6 | 4.0 | <b>4.3</b> | 4.5 | 4.8 | 5.0 |
| 86                | 4.1                           | 4.7 | 5.3 | <b>5.8</b> | 6.2 | 6.6 | 7.0 | 3.1     | 3.6 | 3.9 | <b>4.2</b> | 4.4 | 4.7 | 4.9 |
| 88                | 4.0                           | 4.7 | 5.2 | <b>5.7</b> | 6.1 | 6.5 | 6.8 | 3.1     | 3.5 | 3.8 | <b>4.1</b> | 4.4 | 4.6 | 4.8 |
| 90                | 4.0                           | 4.6 | 5.1 | <b>5.5</b> | 6.0 | 6.3 | 6.7 | 3.1     | 3.5 | 3.8 | <b>4.1</b> | 4.3 | 4.5 | 4.7 |
| 92                | 3.9                           | 4.4 | 5.0 | <b>5.4</b> | 5.8 | 6.2 | 6.5 | 3.1     | 3.5 | 3.8 | <b>4.0</b> | 4.2 | 4.5 | 4.6 |
| 94                | 3.8                           | 4.3 | 4.8 | <b>5.3</b> | 5.7 | 6.0 | 6.4 | 3.1     | 3.4 | 3.7 | <b>4.0</b> | 4.2 | 4.4 | 4.6 |
| 96                | 3.7                           | 4.2 | 4.7 | <b>5.1</b> | 5.5 | 5.9 | 6.2 | 3.1     | 3.4 | 3.7 | <b>3.9</b> | 4.2 | 4.3 | 4.5 |
| 98                | 3.5                           | 4.1 | 4.6 | <b>5.0</b> | 5.4 | 5.7 | 6.1 | 3.0     | 3.4 | 3.7 | <b>3.9</b> | 4.1 | 4.3 | 4.5 |
| 100               | 3.4                           | 4.0 | 4.4 | <b>4.8</b> | 5.2 | 5.6 | 5.9 | 3.0     | 3.4 | 3.6 | <b>3.9</b> | 4.1 | 4.2 | 4.4 |

Abbreviation: SRT-WR<sub>peak</sub>=peak work rate attained at the Steep Ramp Test

Supplementary Table 8. Fat-free mass- and sex-related reference centiles for absolute SRT- $WR_{peak}$ .

| Fat-free mass<br>(kg) | SRT- $WR_{peak}$ (W) |     |     |            |     |     |     |         |     |     |            |     |     |     |
|-----------------------|----------------------|-----|-----|------------|-----|-----|-----|---------|-----|-----|------------|-----|-----|-----|
|                       | Males                |     |     |            |     |     |     | Females |     |     |            |     |     |     |
|                       | P3                   | P10 | P25 | <b>P50</b> | P75 | P90 | P97 | P3      | P10 | P25 | <b>P50</b> | P75 | P90 | P97 |
| 20                    | 91                   | 103 | 112 | <b>120</b> | 127 | 134 | 139 | 103     | 110 | 119 | <b>128</b> | 139 | 151 | 164 |
| 22                    | 99                   | 112 | 122 | <b>131</b> | 139 | 146 | 153 | 110     | 118 | 128 | <b>138</b> | 149 | 162 | 176 |
| 24                    | 109                  | 123 | 134 | <b>144</b> | 153 | 161 | 169 | 118     | 128 | 138 | <b>149</b> | 161 | 174 | 188 |
| 26                    | 119                  | 134 | 147 | <b>158</b> | 168 | 177 | 186 | 127     | 138 | 149 | <b>161</b> | 174 | 187 | 202 |
| 28                    | 130                  | 146 | 160 | <b>172</b> | 184 | 194 | 204 | 138     | 149 | 161 | <b>174</b> | 188 | 202 | 218 |
| 30                    | 142                  | 159 | 174 | <b>188</b> | 201 | 213 | 224 | 149     | 162 | 175 | <b>189</b> | 204 | 219 | 235 |
| 32                    | 156                  | 174 | 190 | <b>205</b> | 220 | 233 | 246 | 162     | 176 | 190 | <b>205</b> | 221 | 237 | 253 |
| 34                    | 169                  | 189 | 206 | <b>223</b> | 239 | 254 | 268 | 175     | 190 | 206 | <b>222</b> | 239 | 255 | 273 |
| 36                    | 183                  | 204 | 223 | <b>241</b> | 258 | 275 | 291 | 189     | 205 | 222 | <b>240</b> | 257 | 275 | 293 |
| 38                    | 198                  | 219 | 239 | <b>259</b> | 278 | 296 | 314 | 203     | 221 | 239 | <b>257</b> | 276 | 295 | 314 |
| 40                    | 212                  | 234 | 255 | <b>276</b> | 297 | 317 | 337 | 216     | 235 | 255 | <b>274</b> | 294 | 315 | 335 |
| 42                    | 227                  | 250 | 272 | <b>294</b> | 316 | 338 | 360 | 228     | 249 | 270 | <b>290</b> | 312 | 333 | 354 |
| 44                    | 243                  | 266 | 289 | <b>312</b> | 336 | 360 | 383 | 239     | 261 | 283 | <b>305</b> | 327 | 349 | 371 |
| 46                    | 258                  | 282 | 306 | <b>330</b> | 355 | 380 | 406 | 247     | 271 | 294 | <b>317</b> | 340 | 363 | 386 |
| 48                    | 273                  | 297 | 322 | <b>347</b> | 373 | 400 | 428 | 253     | 278 | 303 | <b>327</b> | 351 | 375 | 398 |
| 50                    | 287                  | 312 | 337 | <b>363</b> | 390 | 418 | 447 | 258     | 285 | 311 | <b>336</b> | 360 | 384 | 407 |
| 52                    | 300                  | 325 | 351 | <b>378</b> | 406 | 435 | 465 | 261     | 290 | 318 | <b>344</b> | 368 | 392 | 415 |
| 54                    | 312                  | 338 | 364 | <b>392</b> | 420 | 450 | 481 | 263     | 295 | 324 | <b>351</b> | 376 | 399 | 422 |
| 56                    | 323                  | 349 | 376 | <b>405</b> | 434 | 464 | 496 | 265     | 299 | 330 | <b>357</b> | 382 | 406 | 428 |
| 58                    | 334                  | 360 | 388 | <b>417</b> | 447 | 478 | 509 | 267     | 304 | 335 | <b>363</b> | 389 | 412 | 433 |
| 60                    | 344                  | 371 | 400 | <b>429</b> | 459 | 490 | 522 | 268     | 308 | 341 | <b>369</b> | 395 | 418 | 439 |
| 62                    | 353                  | 382 | 411 | <b>441</b> | 471 | 502 | 534 | 269     | 312 | 346 | <b>375</b> | 401 | 424 | 445 |
| 64                    | 363                  | 392 | 422 | <b>452</b> | 483 | 514 | 546 | 269     | 316 | 352 | <b>381</b> | 407 | 430 | 450 |
| 66                    | 372                  | 402 | 433 | <b>463</b> | 494 | 525 | 556 | 270     | 320 | 357 | <b>387</b> | 413 | 436 | 456 |
| 68                    | 381                  | 412 | 443 | <b>474</b> | 505 | 535 | 566 |         |     |     |            |     |     |     |
| 70                    | 390                  | 422 | 453 | <b>484</b> | 515 | 545 | 575 |         |     |     |            |     |     |     |
| 72                    | 399                  | 432 | 463 | <b>494</b> | 525 | 555 | 584 |         |     |     |            |     |     |     |
| 74                    | 408                  | 442 | 474 | <b>505</b> | 535 | 564 | 593 |         |     |     |            |     |     |     |
| 76                    | 418                  | 451 | 483 | <b>514</b> | 544 | 573 | 601 |         |     |     |            |     |     |     |
| 78                    | 427                  | 461 | 493 | <b>524</b> | 553 | 581 | 609 |         |     |     |            |     |     |     |
| 80                    | 436                  | 470 | 503 | <b>533</b> | 562 | 590 | 616 |         |     |     |            |     |     |     |

Abbreviation: SRT- $WR_{peak}$ =peak work rate attained at the Steep Ramp Test



Supplementary Table 9. Fat-free mass- and sex-related reference centiles for SRT-WR<sub>peak</sub> normalized for body mass.

| Fat-free mass<br>(kg) | SRT-WR <sub>peak</sub> (W/kg) |     |     |            |     |     |     |         |     |     |            |     |     |     |
|-----------------------|-------------------------------|-----|-----|------------|-----|-----|-----|---------|-----|-----|------------|-----|-----|-----|
|                       | Males                         |     |     |            |     |     |     | Females |     |     |            |     |     |     |
|                       | P3                            | P10 | P25 | <b>P50</b> | P75 | P90 | P97 | P3      | P10 | P25 | <b>P50</b> | P75 | P90 | P97 |
| 20                    | 3.3                           | 4.0 | 4.5 | <b>5.0</b> | 5.3 | 5.7 | 6.0 | 3.4     | 3.9 | 4.5 | <b>5.0</b> | 5.6 | 6.2 | 6.8 |
| 22                    | 3.3                           | 4.0 | 4.5 | <b>5.0</b> | 5.4 | 5.7 | 6.1 | 3.4     | 3.9 | 4.5 | <b>5.0</b> | 5.5 | 6.1 | 6.7 |
| 24                    | 3.4                           | 4.0 | 4.6 | <b>5.0</b> | 5.4 | 5.8 | 6.1 | 3.5     | 3.9 | 4.4 | <b>5.0</b> | 5.5 | 6.0 | 6.6 |
| 26                    | 3.4                           | 4.1 | 4.6 | <b>5.1</b> | 5.5 | 5.9 | 6.2 | 3.5     | 4.0 | 4.5 | <b>5.0</b> | 5.5 | 6.0 | 6.5 |
| 28                    | 3.4                           | 4.1 | 4.7 | <b>5.1</b> | 5.6 | 5.9 | 6.3 | 3.5     | 4.0 | 4.5 | <b>5.0</b> | 5.5 | 6.0 | 6.5 |
| 30                    | 3.5                           | 4.2 | 4.7 | <b>5.2</b> | 5.7 | 6.1 | 6.4 | 3.6     | 4.0 | 4.5 | <b>5.0</b> | 5.5 | 6.0 | 6.5 |
| 32                    | 3.6                           | 4.3 | 4.8 | <b>5.3</b> | 5.8 | 6.2 | 6.6 | 3.6     | 4.1 | 4.6 | <b>5.1</b> | 5.5 | 6.0 | 6.5 |
| 34                    | 3.7                           | 4.4 | 4.9 | <b>5.5</b> | 5.9 | 6.4 | 6.8 | 3.7     | 4.2 | 4.7 | <b>5.1</b> | 5.6 | 6.0 | 6.5 |
| 36                    | 3.8                           | 4.5 | 5.0 | <b>5.6</b> | 6.1 | 6.5 | 6.9 | 3.8     | 4.3 | 4.7 | <b>5.2</b> | 5.6 | 6.0 | 6.5 |
| 38                    | 3.9                           | 4.6 | 5.1 | <b>5.7</b> | 6.2 | 6.7 | 7.1 | 3.8     | 4.3 | 4.8 | <b>5.2</b> | 5.7 | 6.1 | 6.5 |
| 40                    | 4.0                           | 4.6 | 5.2 | <b>5.8</b> | 6.3 | 6.8 | 7.2 | 3.9     | 4.4 | 4.8 | <b>5.3</b> | 5.7 | 6.1 | 6.4 |
| 42                    | 4.1                           | 4.7 | 5.3 | <b>5.9</b> | 6.4 | 6.9 | 7.4 | 3.9     | 4.4 | 4.9 | <b>5.3</b> | 5.7 | 6.1 | 6.4 |
| 44                    | 4.1                           | 4.8 | 5.4 | <b>6.0</b> | 6.5 | 7.0 | 7.5 | 3.9     | 4.4 | 4.9 | <b>5.3</b> | 5.7 | 6.0 | 6.4 |
| 46                    | 4.2                           | 4.9 | 5.5 | <b>6.0</b> | 6.5 | 7.0 | 7.5 | 3.9     | 4.4 | 4.8 | <b>5.3</b> | 5.6 | 6.0 | 6.3 |
| 48                    | 4.3                           | 4.9 | 5.5 | <b>6.1</b> | 6.6 | 7.1 | 7.6 | 3.8     | 4.3 | 4.8 | <b>5.2</b> | 5.6 | 5.9 | 6.3 |
| 50                    | 4.3                           | 4.9 | 5.5 | <b>6.1</b> | 6.6 | 7.1 | 7.6 | 3.7     | 4.3 | 4.7 | <b>5.1</b> | 5.5 | 5.8 | 6.2 |
| 52                    | 4.3                           | 5.0 | 5.5 | <b>6.1</b> | 6.6 | 7.1 | 7.5 | 3.6     | 4.2 | 4.6 | <b>5.0</b> | 5.4 | 5.7 | 6.0 |
| 54                    | 4.3                           | 5.0 | 5.5 | <b>6.1</b> | 6.6 | 7.0 | 7.5 | 3.5     | 4.0 | 4.5 | <b>4.9</b> | 5.3 | 5.6 | 5.9 |
| 56                    | 4.3                           | 5.0 | 5.5 | <b>6.1</b> | 6.5 | 7.0 | 7.4 | 3.3     | 3.9 | 4.4 | <b>4.7</b> | 5.1 | 5.4 | 5.7 |
| 58                    | 4.3                           | 5.0 | 5.5 | <b>6.1</b> | 6.5 | 7.0 | 7.4 | 3.2     | 3.7 | 4.2 | <b>4.6</b> | 4.9 | 5.2 | 5.5 |
| 60                    | 4.3                           | 5.0 | 5.5 | <b>6.1</b> | 6.5 | 7.0 | 7.4 | 3.0     | 3.6 | 4.0 | <b>4.4</b> | 4.7 | 5.0 | 5.3 |
| 62                    | 4.3                           | 5.0 | 5.6 | <b>6.1</b> | 6.5 | 7.0 | 7.3 | 2.9     | 3.4 | 3.8 | <b>4.2</b> | 4.5 | 4.7 | 5.0 |
| 64                    | 4.3                           | 5.0 | 5.6 | <b>6.1</b> | 6.5 | 6.9 | 7.3 | 2.7     | 3.2 | 3.6 | <b>3.9</b> | 4.2 | 4.5 | 4.7 |
| 66                    | 4.3                           | 5.0 | 5.6 | <b>6.1</b> | 6.5 | 6.9 | 7.3 | 2.5     | 3.0 | 3.4 | <b>3.7</b> | 4.0 | 4.3 | 4.5 |
| 68                    | 4.3                           | 5.0 | 5.6 | <b>6.1</b> | 6.5 | 6.9 | 7.3 |         |     |     |            |     |     |     |
| 70                    | 4.3                           | 5.0 | 5.6 | <b>6.1</b> | 6.5 | 6.9 | 7.2 |         |     |     |            |     |     |     |
| 72                    | 4.3                           | 5.1 | 5.6 | <b>6.1</b> | 6.5 | 6.9 | 7.2 |         |     |     |            |     |     |     |
| 74                    | 4.4                           | 5.1 | 5.6 | <b>6.1</b> | 6.5 | 6.9 | 7.2 |         |     |     |            |     |     |     |
| 76                    | 4.4                           | 5.1 | 5.7 | <b>6.1</b> | 6.5 | 6.9 | 7.2 |         |     |     |            |     |     |     |
| 78                    | 4.4                           | 5.1 | 5.7 | <b>6.1</b> | 6.5 | 6.8 | 7.1 |         |     |     |            |     |     |     |
| 80                    | 4.5                           | 5.2 | 5.7 | <b>6.1</b> | 6.5 | 6.8 | 7.1 |         |     |     |            |     |     |     |

Abbreviation: SRT-WR<sub>peak</sub>=peak work rate attained at the Steep Ramp Test

Supplementary Table 10. Fat-free mass- and sex-related reference centiles for SRT-WR<sub>peak</sub> normalized for fat-free mass.

| Fat-free mass<br>(kg) | SRT-WR <sub>peak</sub> (W/kg FFM) |     |     |            |     |     |     |         |     |     |            |            |     |     |     |
|-----------------------|-----------------------------------|-----|-----|------------|-----|-----|-----|---------|-----|-----|------------|------------|-----|-----|-----|
|                       | Males                             |     |     |            |     |     |     | Females |     |     |            |            |     |     |     |
|                       | P3                                | P10 | P25 | <b>P50</b> | P75 | P90 | P97 | P3      | P10 | P25 | <b>P50</b> | P75        | P90 | P97 |     |
| 20                    | 4.3                               | 4.9 | 5.4 | <b>5.8</b> | 6.2 | 6.5 | 6.8 | 4.3     | 4.8 | 5.2 | 5.7        | <b>6.1</b> | 6.7 | 7.3 | 8.0 |
| 22                    | 4.4                               | 5.0 | 5.5 | <b>5.9</b> | 6.3 | 6.6 | 6.9 | 4.4     | 4.8 | 5.2 | 5.7        | <b>6.2</b> | 6.7 | 7.3 | 7.9 |
| 24                    | 4.5                               | 5.1 | 5.5 | <b>6.0</b> | 6.4 | 6.7 | 7.0 | 4.5     | 4.9 | 5.3 | 5.7        | <b>6.2</b> | 6.7 | 7.3 | 7.9 |
| 26                    | 4.6                               | 5.1 | 5.6 | <b>6.1</b> | 6.5 | 6.8 | 7.2 | 4.6     | 4.9 | 5.3 | 5.8        | <b>6.2</b> | 6.8 | 7.3 | 7.9 |
| 28                    | 4.7                               | 5.2 | 5.7 | <b>6.2</b> | 6.6 | 7.0 | 7.3 | 4.7     | 4.9 | 5.4 | 5.8        | <b>6.3</b> | 6.8 | 7.3 | 7.9 |
| 30                    | 4.8                               | 5.3 | 5.8 | <b>6.3</b> | 6.7 | 7.1 | 7.5 | 4.8     | 5.0 | 5.4 | 5.9        | <b>6.4</b> | 6.9 | 7.4 | 7.9 |
| 32                    | 4.9                               | 5.4 | 5.9 | <b>6.4</b> | 6.9 | 7.3 | 7.7 | 4.9     | 5.1 | 5.5 | 6.0        | <b>6.5</b> | 7.0 | 7.5 | 8.0 |
| 34                    | 5.0                               | 5.5 | 6.1 | <b>6.5</b> | 7.0 | 7.5 | 7.9 | 5.0     | 5.1 | 5.6 | 6.1        | <b>6.6</b> | 7.1 | 7.6 | 8.1 |
| 36                    | 5.1                               | 5.6 | 6.2 | <b>6.7</b> | 7.2 | 7.6 | 8.1 | 5.1     | 5.2 | 5.7 | 6.2        | <b>6.7</b> | 7.2 | 7.7 | 8.2 |
| 38                    | 5.2                               | 5.7 | 6.3 | <b>6.8</b> | 7.3 | 7.8 | 8.3 | 5.2     | 5.3 | 5.8 | 6.3        | <b>6.8</b> | 7.2 | 7.7 | 8.3 |
| 40                    | 5.3                               | 5.8 | 6.4 | <b>6.9</b> | 7.4 | 7.9 | 8.4 | 5.3     | 5.4 | 5.9 | 6.3        | <b>6.8</b> | 7.3 | 7.8 | 8.3 |
| 42                    | 5.4                               | 5.9 | 6.5 | <b>7.0</b> | 7.5 | 8.1 | 8.6 | 5.4     | 5.4 | 5.9 | 6.4        | <b>6.9</b> | 7.4 | 7.9 | 8.4 |
| 44                    | 5.5                               | 6.0 | 6.6 | <b>7.1</b> | 7.6 | 8.2 | 8.7 | 5.5     | 5.4 | 5.9 | 6.4        | <b>6.9</b> | 7.4 | 7.9 | 8.4 |
| 46                    | 5.6                               | 6.1 | 6.6 | <b>7.2</b> | 7.7 | 8.3 | 8.8 | 5.6     | 5.4 | 5.9 | 6.4        | <b>6.9</b> | 7.4 | 7.9 | 8.4 |
| 48                    | 5.7                               | 6.2 | 6.7 | <b>7.2</b> | 7.8 | 8.3 | 8.9 | 5.7     | 5.3 | 5.8 | 6.3        | <b>6.8</b> | 7.3 | 7.8 | 8.3 |
| 50                    | 5.8                               | 6.2 | 6.7 | <b>7.3</b> | 7.8 | 8.4 | 9.0 | 5.8     | 5.2 | 5.7 | 6.2        | <b>6.7</b> | 7.2 | 7.7 | 8.2 |
| 52                    | 5.8                               | 6.3 | 6.8 | <b>7.3</b> | 7.8 | 8.4 | 9.0 | 5.8     | 5.0 | 5.6 | 6.1        | <b>6.6</b> | 7.1 | 7.6 | 8.0 |
| 54                    | 5.8                               | 6.3 | 6.8 | <b>7.3</b> | 7.8 | 8.4 | 8.9 | 5.8     | 4.9 | 5.5 | 6.0        | <b>6.5</b> | 7.0 | 7.4 | 7.8 |
| 56                    | 5.8                               | 6.3 | 6.7 | <b>7.2</b> | 7.8 | 8.3 | 8.9 | 5.8     | 4.7 | 5.4 | 5.9        | <b>6.4</b> | 6.9 | 7.3 | 7.7 |
| 58                    | 5.8                               | 6.2 | 6.7 | <b>7.2</b> | 7.7 | 8.2 | 8.8 | 5.8     | 4.6 | 5.2 | 5.8        | <b>6.3</b> | 6.7 | 7.1 | 7.5 |
| 60                    | 5.7                               | 6.2 | 6.7 | <b>7.2</b> | 7.7 | 8.2 | 8.7 | 5.7     | 4.5 | 5.1 | 5.7        | <b>6.2</b> | 6.6 | 7.0 | 7.3 |
| 62                    | 5.7                               | 6.2 | 6.6 | <b>7.1</b> | 7.6 | 8.1 | 8.6 | 5.7     | 4.3 | 5.0 | 5.6        | <b>6.0</b> | 6.5 | 6.8 | 7.2 |
| 64                    | 5.7                               | 6.1 | 6.6 | <b>7.1</b> | 7.6 | 8.0 | 8.5 | 5.7     | 4.1 | 4.9 | 5.5        | <b>5.9</b> | 6.3 | 6.7 | 7.0 |
| 66                    | 5.6                               | 6.1 | 6.6 | <b>7.0</b> | 7.5 | 8.0 | 8.4 | 5.6     | 4.0 | 4.8 | 5.3        | <b>5.8</b> | 6.2 | 6.5 | 6.8 |
| 68                    | 5.6                               | 6.1 | 6.5 | <b>7.0</b> | 7.4 | 7.9 | 8.3 | 5.6     |     |     |            |            |     |     |     |
| 70                    | 5.6                               | 6.0 | 6.5 | <b>6.9</b> | 7.4 | 7.8 | 8.2 | 5.6     |     |     |            |            |     |     |     |
| 72                    | 5.5                               | 6.0 | 6.4 | <b>6.9</b> | 7.3 | 7.7 | 8.1 | 5.5     |     |     |            |            |     |     |     |
| 74                    | 5.5                               | 6.0 | 6.4 | <b>6.8</b> | 7.2 | 7.6 | 8.0 | 5.5     |     |     |            |            |     |     |     |
| 76                    | 5.5                               | 5.9 | 6.3 | <b>6.7</b> | 7.1 | 7.5 | 7.9 | 5.5     |     |     |            |            |     |     |     |
| 78                    | 5.4                               | 5.9 | 6.3 | <b>6.7</b> | 7.0 | 7.4 | 7.7 | 5.4     |     |     |            |            |     |     |     |
| 80                    | 5.4                               | 5.8 | 6.2 | <b>6.6</b> | 6.9 | 7.3 | 7.6 | 5.4     |     |     |            |            |     |     |     |

Abbreviations: FFM=fat-free mass; WR<sub>peak</sub>=peak work rate.
